# Supplementary material
Source: publisher figshare collection journal article supplement (https://sage.figshare.com/ndownloader/files/20442933)
Supplement: Supplementary file 1 [file 20442933]

We agree to the proposed change of authorship to the above paper. NB: all authors (added and removed) must sign below.

[illegible]
